# Supplementary material
Source: MDPI journal article supplement (https://www.mdpi.com/2311-7524/10/5/490)
Supplement: s1 [file s1]

**Figure S1.** The effect of Rootstock on total soluble solids (A), titratable acidity (B) and pH (C) during ripening. Significant differences ( $p < 0.05$ ) among rootstocks within sampling days are indicated by different letters.

**Figure S2.** The effect of Rootstock on Total phenols (A) per berry and (B) per berry weight. Significant differences ( $p < 0.05$ ) among rootstocks are indicated by different letters.

**Table S1.** The effect of Rootstock on grape berry and bunch features. Measurements presented were conducted at harvest. Within each column and parameter, means followed by a different letter are significantly different at  $P < 0.05$  based on Duncan test. \*: interaction between Rootstock and Year ( $R \times \text{year}$ ) at  $P < 0.05$ . ns: absence of interaction between Rootstock and Year ( $R \times \text{year}$ ).

| Year                   | Rootstock  | Berry weight (g) | Cluster Length (cm) | Cluster Width (cm) | Berry number/cluster | Cluster compactness (berries/cm) |
|------------------------|------------|------------------|---------------------|--------------------|----------------------|----------------------------------|
| 2016                   | 101-14 MGt | 1.74 b           | 14.06 b             | 11.13 b            | 137 b                | 9.75                             |
|                        | 3309 C     | 1.79 b           | 16.37 a             | 12.56 ab           | 196 a                | 12.00                            |
|                        | 110 R      | 2.01 a           | 16.50 a             | 12.58 ab           | 180 a                | 10.91                            |
|                        | 140 Ru     | 2.17 a           | 16.46 a             | 13.30 a            | 187 a                | 11.18                            |
| 2017                   | 101-14 MGt | 1.68 c           | 14.46 b             | 12.43              | 143 b                | 9.96                             |
|                        | 3309 C     | 1.97 b           | 16.00 ab            | 11.40              | 163 a                | 10.16                            |
|                        | 110 R      | 2.32 a           | 14.70 b             | 12.30              | 167 a                | 11.38                            |
|                        | 140 Ru     | 2.41 a           | 16.83 a             | 12.61              | 175 a                | 10.38                            |
| $R \times \text{year}$ |            | ns               | ns                  | *                  | ns                   | ns                               |
